# Supplementary material
Source: MDPI journal article supplement (https://www.mdpi.com/2313-4321/3/3/31)
Supplement: s1 [file s1]

Archive with 1 entries (1 files):
- recycling-288377-SI.pdf
