# Supplementary material
Source: MDPI journal article supplement (https://www.mdpi.com/2313-4321/3/3/31)
Supplement: s1 [file s1 › recycling-288377-SI.pdf]

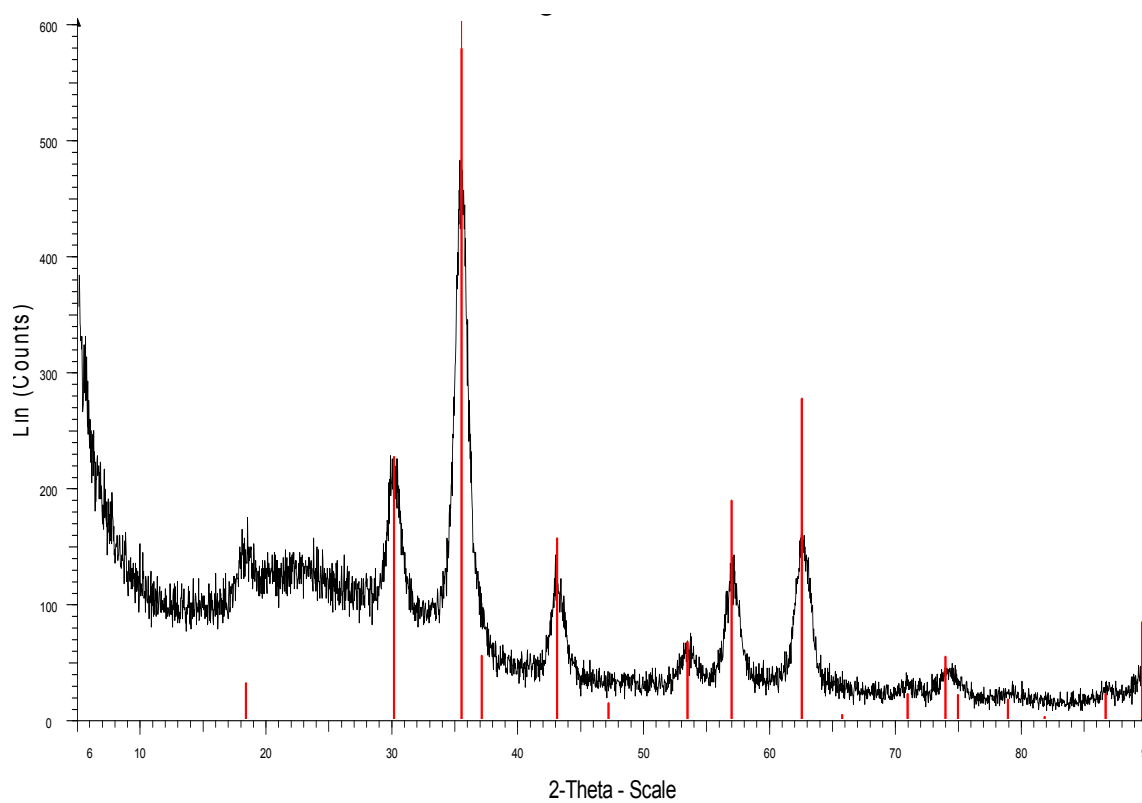

**Figure S1.** XRPD spectrum of magnetite nanoparticles. The peaks assigned to  $\text{Fe}_3\text{O}_4$  are marked with red lines.

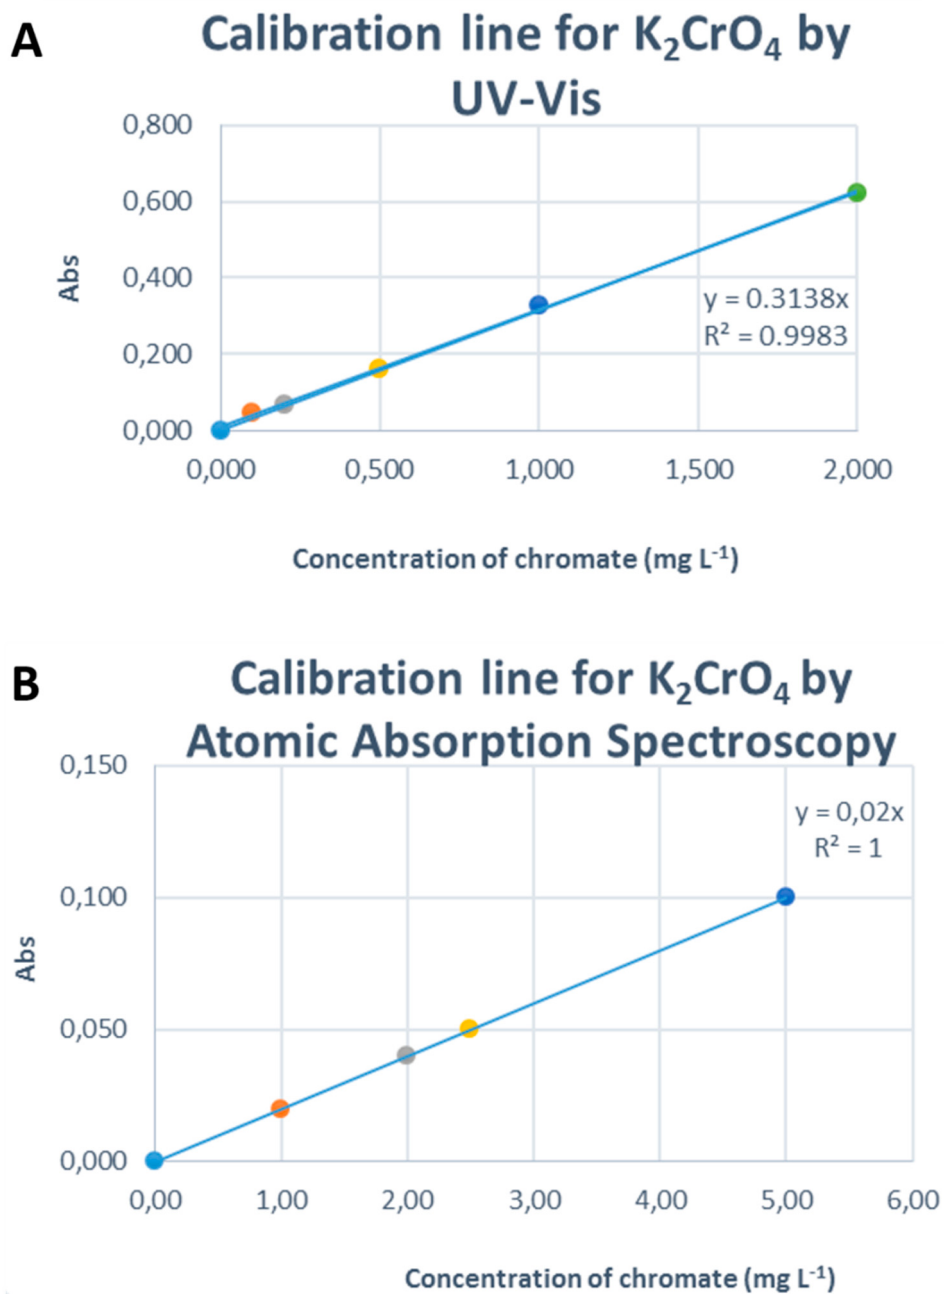

**Figure S2.** Calibration lines for chromate by a) UV-vis, b) AAS.

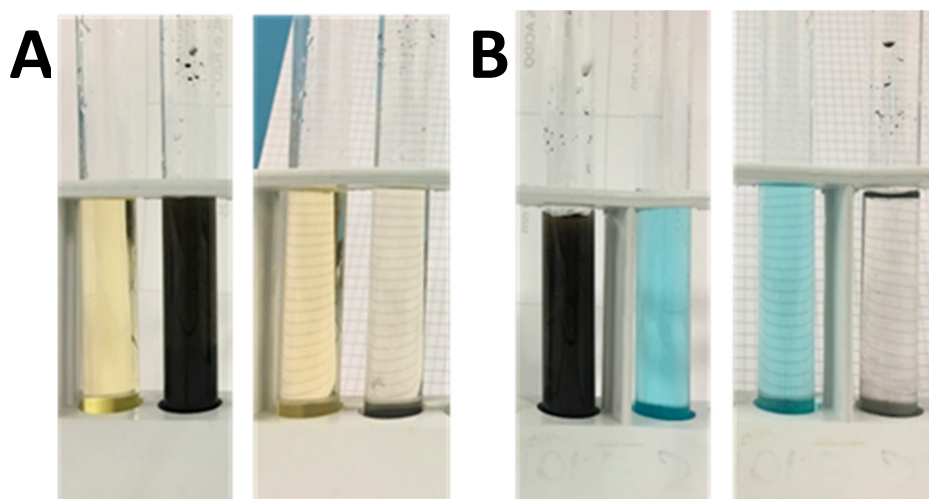

**Figure S3.** Pictures showing the appearance of dye solutions before and after treatment with the magnetite-carbon composite: a) methyl orange, b) methylene blue.

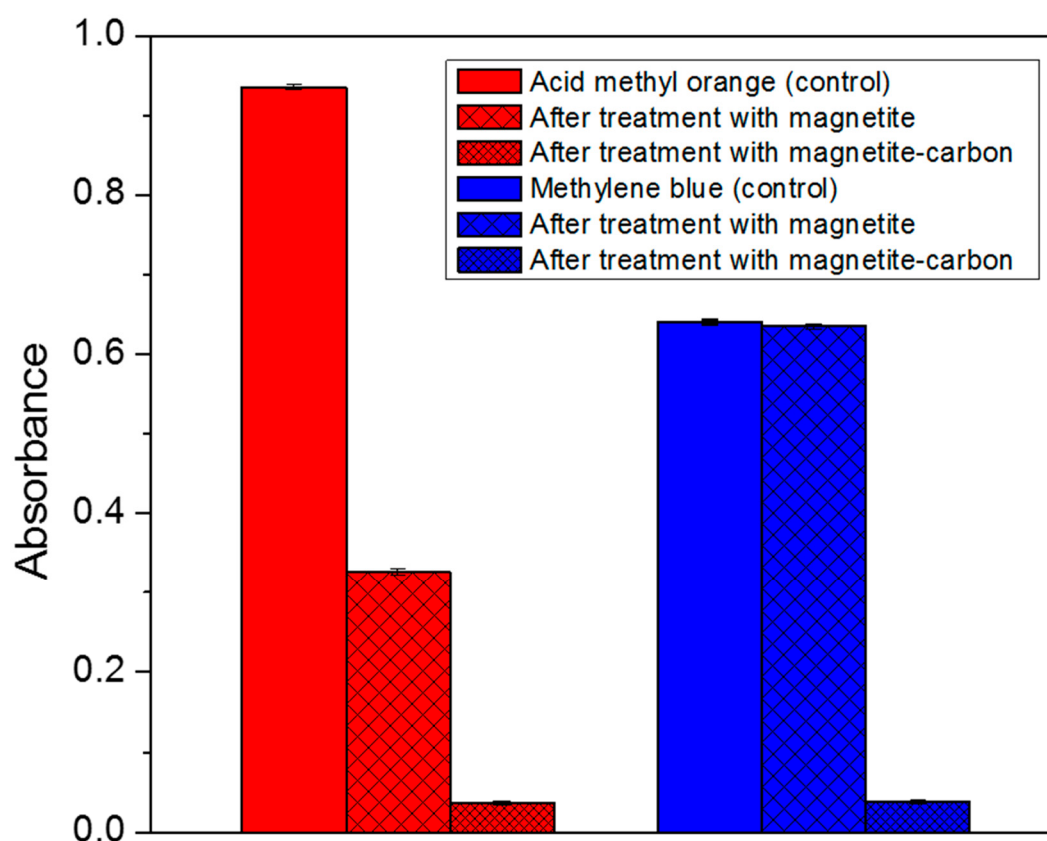

**Figure S4.** Reproducibility test for the removal efficiency of the magnetite-carbon nanocomposite. The results are the average of three different measurements. Conditions: 0.05 mg of dye, 0.24 g of particles, 10 mL water, contact time 10 min.

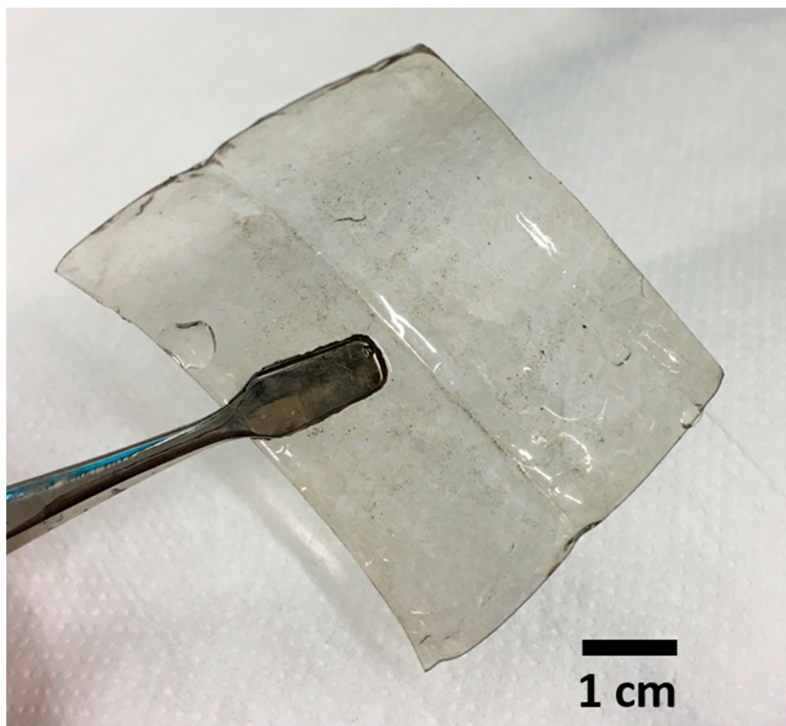

**Figure S5.** A piece of the water purification device showing its transparency after aminolysis and decoration with the magnetite-carbon nanocomposite. The picture also demonstrates that the nanocomposite is evenly distributed on the plastic surface.
